# Supplementary material for: Insights into the mechanism of the enhanced visible-light photocatalytic activity of black phosphorus/BiVO4 heterostructure: a first-principles study
Source: Royal Society of Chemistry journal article supplement (doi:10.1039/c8ta07321j), 2018-01-01
Supplement: c8ta07321j1.pdf [file c8ta07321j1.pdf]

# **Insights into the mechanism of enhanced visible-light photocatalytic activity of black phosphorus/BiVO<sub>4</sub> heterostructure: a first-principles study**

Yuxuan Chen,<sup>a</sup> Tingting Shi,<sup>\*b</sup> Pengyi Liu,<sup>b</sup> Xinguo Ma,<sup>c</sup> Lingling Shui,<sup>a</sup> Chaoqun Shang,<sup>a</sup> Zhihong Chen,<sup>d</sup> Xin Wang,<sup>\*a</sup> Krzysztof Kempa<sup>ae</sup> and Guofu Zhou<sup>a</sup>

*<sup>a</sup>National Center for International Research on Green Optoelectronics, South China Normal University, Guangzhou 510006, China*

*<sup>b</sup>Siyuan Laboratory, Guangzhou Key Laboratory of Vacuum Coating Technologies and New Energy Materials, Department of Physics, Jinan University, Guangzhou 510632, China*

*<sup>c</sup>School of Science, Hubei University of Technology, Wuhan 430068, China*

*<sup>d</sup>Shenyang Institute of Automation, Guangzhou, Chinese Academy of Sciences, Guangzhou 511458, China*

*<sup>e</sup>Department of Physics, Boston College, Chestnut Hill, Massachusetts 02467, USA*

1. The optimized geometry of black phosphorus/BiVO<sub>4</sub> heterostructure are shown in Figure S1. Considering four representational high-symmetric stacking patterns: (1) the underlayer of the phosphorene layer directly aligns with and above the top sites of the top O atom of BiVO<sub>4</sub>(001) surface, denoted in the P1 structure (Figure S1 a-b). (2) the upper layer of the phosphorene layer aligns with the top O atom of BiVO<sub>4</sub>(001) surface, denoted the P2 structure (Figure S1 b). (3) the middle-point of the top P-P bond of the phosphorene layer aligns with the top O atom of BiVO<sub>4</sub>(001) surface, denoted the P3 structure (Figure S1 c). (4) the middle-point of the bottom of P-P bond of the phosphorene layer aligns with and above the hollow sites the top O atom of BiVO<sub>4</sub>(001) surface, denoted in the P4 structure (Figure S1 d)

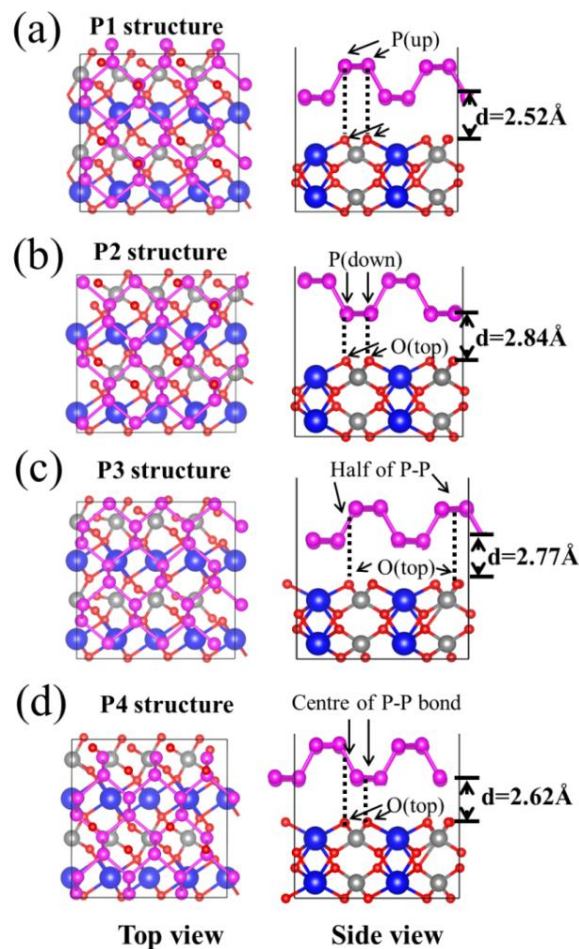

Figure S1: (a) The optimized geometry of black phosphorus/BiVO<sub>4</sub> heterostructure for P1(a), P2(b), P3(c), P4(d) structure, respectively.

2、 Relative total energy of the four representational high-symmetric stacking patterns. The P4 structure demonstrates the lowest energy, which indicate that the P4 structure is most energetically favorable.

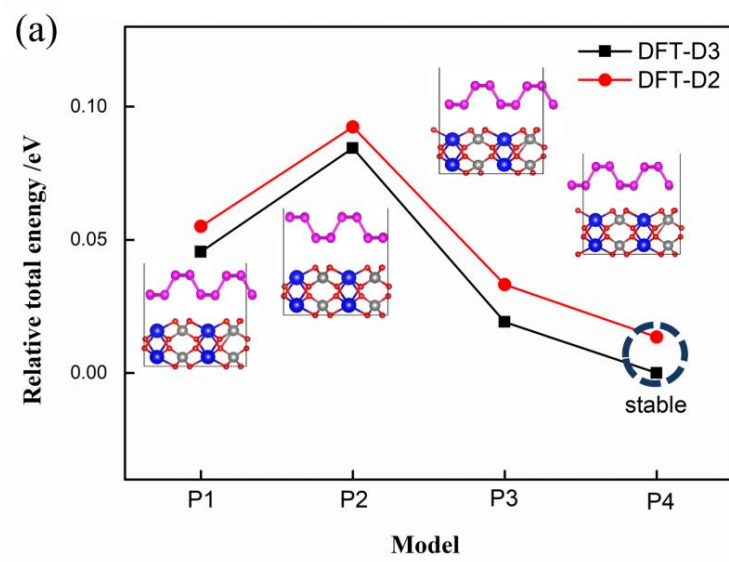

Figure S2: Relative total energy of the four representational high-symmetric stacking patterns calculated by DFT-D3 and DFT-D2 method, respectively.

**Table 1.** Band gaps of the referred materials.

| Method                                 | BP mono | BP bulk | BiVO <sub>4</sub> bulk | BiVO <sub>4</sub> (001) | BP/BiVO <sub>4</sub> | Source                  |
|----------------------------------------|---------|---------|------------------------|-------------------------|----------------------|-------------------------|
| photoluminescence<br>(optical gap, eV) | 2.0     | 0.35    |                        |                         |                      | Buscema <sup>4</sup>    |
|                                        | 2.0-2.1 | 0.33    |                        |                         |                      | Gomez <sup>6</sup>      |
|                                        | 1.45    |         |                        |                         |                      | Wang <sup>7</sup>       |
|                                        |         |         | 2.4                    |                         |                      | Song <sup>8</sup>       |
|                                        |         |         | 2.4                    | 2.54                    |                      | Xi <sup>9</sup>         |
| electrical<br>(mobility gap, eV)       | 0.98    | 0.30    |                        |                         |                      | Das <sup>5</sup>        |
| Computation<br>(band gap, eV)          | 2.0     | 0.3     |                        |                         |                      | Tran <sup>1</sup>       |
|                                        | 1.94    | 0.43    |                        |                         |                      | Liang <sup>2</sup>      |
|                                        | 1.51    | 0.36    |                        |                         |                      | Qiao <sup>12</sup>      |
|                                        | 1.01    | 0.31    |                        |                         |                      | Liu <sup>3</sup>        |
|                                        | 1.07    | 0.43    |                        |                         |                      | Gomez <sup>6</sup>      |
|                                        |         |         |                        | 2.16                    |                      | Walsh <sup>10</sup>     |
|                                        |         |         | 2.09/2.41(HSE)         |                         |                      | Wadnerkar <sup>11</sup> |
| Computation<br>(band gap, eV)          | 0.98    | 0.15    | 2.05                   | 2.52                    | 0.76                 | this work               |
|                                        | 1.51    | 0.50    | 2.60                   | 2.96                    | 0.89                 |                         |

**Reference:**

1. Phys. Rev. B, 2014, 89, 235319 .
2. Nano Lett. 2014, 14, 6400–6406.
3. ACS Nano 2014, 8, 4033–4041.
4. Nano Lett. 2014, 14, 3347–3352
5. Nano Lett. 2014, 14, 5733–5739.
6. 2D Materials 1, 2014, 025001
7. Nat. Nanotechnol. 2015, 10, 517–521
8. J. Mater. Chem. A, 2017, 5, 18831
9. Chem. Commun., 2010, 46, 1893–1895
10. Chem. Mater. 2009,21, 547-551
11. Computational MaterialsScience, 2013, 74, 33–39
12. Nature Communications, 2014, 5, 4475
